# Supplementary material for: Self-Mating in the Definitive Host Potentiates Clonal Outbreaks of the Apicomplexan Parasites Sarcocystis neurona and Toxoplasma gondii
Source: PubMed Central journal article supplement (PMC3009688; doi:10.1371/journal.pgen.1001261), 2010-12-23
Supplement: pgen.1001261.s001.pdf [file pgen.1001261.s001.pdf]

Table S1

*Sarcocystis neurona* genotypes and sample source information ‡

| Sample | ATOS/Geo. Loc. | Date collected | Source#         | Ag Type | MS Type | Genetic Marker |   |   |   |   |         |     |     |      |         |       |       |       |       |       | NT count |       |       |       |       |        |        |         |
|--------|----------------|----------------|-----------------|---------|---------|----------------|---|---|---|---|---------|-----|-----|------|---------|-------|-------|-------|-------|-------|----------|-------|-------|-------|-------|--------|--------|---------|
|        |                |                |                 |         |         | SnSAG1-5-6     |   |   |   |   | SnSAG3* |     |     |      | SnSAG4† | Sn2   | Sn3   | Sn4   | Sn5   | Sn7   |          | Sn8   | Sn9   | Sn10  | Sn11  | Sn1520 | Sn1863 | Sn515   |
|        |                |                |                 |         |         | C              | A | T | C | C | 239     | 503 | 504 | 1057 | 592     | (GT)n | (AT)n | (CA)n | (CA)n | (CA)n |          | (CA)n | (GT)n | (AT)n | (CA)n | (CTA)n | (AC)n  | complex |
| SO3106 | 318            | Apr-99         | Wendte et al.   | II      | i       | 1              | G | - | - | T | -       | 9   | 12  | 12   | 9       | 17    | 10    | 17    | 11    | 13    | 9        | 17    | 120   |       |       |        |        |         |
| SO3339 | 46             | Apr-00         | This study      | V       | n       | 5              | G | - | - | T | -       | 9   | 11  | 12   | 9       | 18    | 10    | 16    | 9     | 13    | 9        | 15    | 81    |       |       |        |        |         |
| SO3483 | 820            | Mar-01         | Wendte et al.   | I       | a       | 5              | - | - | - | - | -       | 10  | 11  | 13   | 9       | 22    | 10    | 17    | 9     | 14    | 10       | 16    | 81    |       |       |        |        |         |
| SO3485 | 827            | Mar-01         | Wendte et al.   | I       | a       | 5              | - | - | - | - | -       | 10  | 11  | 13   | 9       | 22    | 10    | 17    | 9     | 14    | 10       | 16    | 81    |       |       |        |        |         |
| SO3501 | 915            | Apr-01         | Wendte et al.   | I       | a       | 5              | - | - | - | - | -       | 10  | 11  | 13   | 9       | 22    | 10    | 17    | 9     | 14    | 10       | 16    | 81    |       |       |        |        |         |
| SO3508 | 827            | Apr-01         | This study      | I       | b       | 5              | - | - | - | - | -       | 10  | 11  | 13   | 9       | 21    | 10    | 17    | 9     | 14    | 10       | 16    | 81    |       |       |        |        |         |
| SO3523 | 141            | May-01         | Wendte et al.   | VII     | y       | 6              | - | - | - | - | G       | 9   | 11  | 13   | 9       | 19    | 10    | 14    | 9     | 15    | 10       | 14    | 81    |       |       |        |        |         |
| SO3528 | 292            | May-01         | Wendte et al.   | II      | g       | 1              | G | - | - | T | -       | 9   | 12  | 12   | 9       | 17    | 10    | 18    | 11    | 13    | 9        | 17    | 120   |       |       |        |        |         |
| SO3629 | 276            | Dec-01         | Wendte et al.   | II      | g       | 1              | G | - | - | T | -       | 9   | 12  | 12   | 9       | 17    | 10    | 18    | 11    | 13    | 9        | 17    | 120   |       |       |        |        |         |
| SO3634 | 258            | 2001           | This study      | X       | z       | 6              | - | - | - | - | -       | 9   | 10  | 13   | 10      | 20    | 10    | 14    | 9     | 14    | 10       | 14    | 81    |       |       |        |        |         |
| SO3639 | 299            | Dec-01         | Wendte et al.   | VII     | x       | 6              | - | - | - | - | G       | 9   | 11  | 13   | 9       | 20    | 10    | 14    | 9     | 15    | 10       | 14    | 81    |       |       |        |        |         |
| SO3660 | 384            | 2002           | This study      | II      | g       | 1              | G | - | - | T | -       | 9   | 12  | 12   | 9       | 17    | 10    | 18    | 11    | 13    | 9        | 17    | 120   |       |       |        |        |         |
| SO3866 | 309            | Apr-03         | Wendte et al.   | II      | g       | 1              | G | - | - | T | -       | 9   | 12  | 12   | 9       | 17    | 10    | 18    | 11    | 13    | 9        | 17    | 120   |       |       |        |        |         |
| SO3892 | 917            | Apr-03         | Wendte et al.   | I       | a       | 5              | - | - | - | - | -       | 10  | 11  | 13   | 9       | 22    | 10    | 17    | 9     | 14    | 10       | 16    | 81    |       |       |        |        |         |
| SO4135 | 824            | Mar-04         | Wendte et al.   | I       | c       | 5              | - | - | - | - | -       | 10  | 11  | 13   | 9       | 21    | 10    | 17    | 9     | 13    | 10       | 16    | 81    |       |       |        |        |         |
| SO4151 | 825            | Apr-04         | Wendte et al.   | I       | c       | 5              | - | - | - | - | -       | 10  | 11  | 13   | 9       | 21    | 10    | 17    | 9     | 13    | 10       | 16    | 81    |       |       |        |        |         |
| SO4166 | 827            | Apr-04         | Wendte et al.   | I       | c       | 5              | - | - | - | - | -       | 10  | 11  | 13   | 9       | 21    | 10    | 17    | 9     | 13    | 10       | 16    | 81    |       |       |        |        |         |
| SO4167 | 827            | Apr-04         | Wendte et al.   | I       | c       | 5              | - | - | - | - | -       | 10  | 11  | 13   | 9       | 21    | 10    | 17    | 9     | 13    | 10       | 16    | 81    |       |       |        |        |         |
| SO4168 | 832            | Apr-04         | Wendte et al.   | I       | d       | 5              | - | - | - | - | -       | 10  | 11  | 12   | 9       | 21    | 10    | 17    | 9     | 13    | 10       | 16    | 81    |       |       |        |        |         |
| SO4169 | 819            | Apr-04         | Wendte et al.   | I       | c       | 5              | - | - | - | - | -       | 10  | 11  | 13   | 9       | 21    | 10    | 17    | 9     | 13    | 10       | 16    | 81    |       |       |        |        |         |
| SO4171 | 819            | Apr-04         | Wendte et al.   | I       | c       | 5              | - | - | - | - | -       | 10  | 11  | 13   | 9       | 21    | 10    | 17    | 9     | 13    | 10       | 16    | 81    |       |       |        |        |         |
| SO4177 | 925            | Apr-04         | This study      | I       | c       | 5              | - | - | - | - | -       | 10  | 11  | 13   | 9       | 21    | 10    | 17    | 9     | 13    | 10       | 16    | 81    |       |       |        |        |         |
| SO4183 | 919            | Apr-04         | This study      | I       | c       | 5              | - | - | - | - | -       | 10  | 11  | 13   | 9       | 21    | 10    | 17    | 9     | 13    | 10       | 16    | 81    |       |       |        |        |         |
| SO4189 | 808            | Apr-04         | This study      | I       | c       | 5              | - | - | - | - | -       | 10  | 11  | 13   | 9       | 21    | 10    | 17    | 9     | 13    | 10       | 16    | 81    |       |       |        |        |         |
| SO4195 | 818            | Apr-04         | This study      | I       | c       | 5              | - | - | - | - | -       | 10  | 11  | 13   | 9       | 21    | 10    | 17    | 9     | 13    | 10       | 16    | 81    |       |       |        |        |         |
| SO4202 | 925            | Apr-04         | This study      | I       | c       | 5              | - | - | - | - | -       | 10  | 11  | 13   | 9       | 21    | 10    | 17    | 9     | 13    | 10       | 16    | 81    |       |       |        |        |         |
| SO4174 | 1137           | Apr-04         | This study      | I       | b       | 5              | - | - | - | - | -       | 10  | 11  | 13   | 9       | 21    | 10    | 17    | 9     | 14    | 10       | 16    | 81    |       |       |        |        |         |
| SO4178 | 1135           | Apr-04         | Wendte et al.   | I       | f       | 5              | - | - | - | - | -       | 10  | 11  | 13   | 9       | 22    | 10    | 18    | 9     | 13    | 11       | 16    | 81    |       |       |        |        |         |
| SO4181 | 303            | Apr-04         | Wendte et al.   | II      | g       | 1              | G | - | - | T | -       | 9   | 12  | 12   | 9       | 17    | 10    | 18    | 11    | 13    | 9        | 17    | 120   |       |       |        |        |         |
| SO4194 | 21             | Apr-04         | Wendte et al.   | IX      | w       | 1              | - | - | - | - | -       | 9   | 10  | 13   | 9       | 20    | 10    | 14    | 9     | 14    | 10       | 14    | 81    |       |       |        |        |         |
| SO4240 | 261            | Jun-04         | This study      | X       | z       | 6              | - | - | - | - | -       | 9   | 10  | 13   | 10      | 20    | 10    | 14    | 9     | 14    | 10       | 14    | 81    |       |       |        |        |         |
| SO4285 | 806            | Aug-04         | Wendte et al.   | I       | c       | 5              | - | - | - | - | -       | 10  | 11  | 13   | 9       | 21    | 10    | 17    | 9     | 13    | 10       | 16    | 81    |       |       |        |        |         |
| SO4289 | 827            | Aug-04         | This study      | I       | c       | 5              | - | - | - | - | -       | 10  | 11  | 13   | 9       | 21    | 10    | 17    | 9     | 13    | 10       | 16    | 81    |       |       |        |        |         |
| SO4413 | 920            | Feb-05         | This study      | III     | i       | 5              | G | - | - | T | G       | 9   | 11  | 12   | 9       | 18    | 10    | 17    | 10    | 13    | 10       | 15    | 81    |       |       |        |        |         |
| SO4529 | 396            | Jul-05         | This study      | II/V    | g       | na             | G | - | - | T | -       | 9   | 12  | 12   | 9       | 17    | 10    | 18    | 11    | 13    | 9        | 17    | 120   |       |       |        |        |         |
| SO4387 | 337            | 2005           | This study      | II      | g       | 1              | G | - | - | T | -       | 9   | 12  | 12   | 9       | 17    | 10    | 18    | 11    | 13    | 9        | 17    | 120   |       |       |        |        |         |
| SO4530 | 924            | 2005           | Rejmanek et al. | I       | e       | na             | - | - | - | - | -       | 10  | 11  | 12   | 9       | 21    | 10    | 16    | 9     | 14    |          |       |       |       |       |        |        |         |

Table S1 Continued

*Sarcocystis neurona* genotypes and sample source information

| Sample    | ATOS/Geo. Loc. | Date collected | Source          | Ag Type | MS Type | Genetic Marker |    |    |         |    |       |       |         |       |       |       |       |       | NT count |       |        |       |         |        |        |       |
|-----------|----------------|----------------|-----------------|---------|---------|----------------|----|----|---------|----|-------|-------|---------|-------|-------|-------|-------|-------|----------|-------|--------|-------|---------|--------|--------|-------|
|           |                |                |                 |         |         | SnSAG1-5-6     |    |    | SnSAG3* |    |       |       | SnSAG4† | Sn2   | Sn3   | Sn4   | Sn5   | Sn7   |          | Sn8   | Sn9    | Sn10  | Sn11    | Sn1520 | Sn1863 | Sn515 |
|           |                |                |                 |         |         | C              | A  | T  | C       | C  | (GT)n | (AT)n | (CA)n   | (CA)n | (CA)n | (CA)n | (GT)n | (AT)n |          | (CA)n | (CTA)n | (AC)n | complex |        |        |       |
| SO4653    | 258            | 2006           | Rejmanek et al. | II/V    | g       | na             | G  | -  | -       | T  | -     | 9     | 12      | 12    | 9     | 17    | 10    | 18    | 11       | 13    |        |       |         |        |        |       |
| SO4697    | 321            | 2006           | Rejmanek et al. | II/V    | g       | na             | G  | -  | -       | T  | -     | 9     | 12      | 12    | 9     | 17    | 10    | 18    | 11       | 13    |        |       |         |        |        |       |
| SO4711    | 321            | 2006           | Rejmanek et al. | II/V    | g       | na             | G  | -  | -       | T  | -     | 9     | 12      | 12    | 9     | 17    | 10    | 18    | 11       | 13    |        |       |         |        |        |       |
| SO4725    | 321            | 2006           | Rejmanek et al. | VI/VII  | u       | na             | -  | -  | -       | -  | G     | 10    | 10      | 13    | 9     | 18    | 10    | 14    | 9        | 14    |        |       |         |        |        |       |
| SO4755    | 808            | 2006           | Rejmanek et al. | I       | a       | na             | -  | -  | -       | -  | -     | 10    | 11      | 13    | 9     | 22    | 10    | 17    | 9        | 14    |        |       |         |        |        |       |
| SO4786    | 370            | 2006           | Rejmanek et al. | II/V    | g       | na             | G  | -  | -       | T  | -     | 9     | 12      | 12    | 9     | 17    | 10    | 18    | 11       | 13    |        |       |         |        |        |       |
| SO4834    | 260            | 2006           | Rejmanek et al. | II/V    | h       | na             | G  | -  | -       | T  | -     | 9     | 12      | 12    | 9     | 16    | 10    | 18    | 11       | 13    |        |       |         |        |        |       |
| SO4928    | 260            | 2007           | Rejmanek et al. | II/V    | g       | na             | G  | -  | -       | T  | -     | 9     | 12      | 12    | 9     | 17    | 10    | 18    | 11       | 13    |        |       |         |        |        |       |
| SO4970    | 260            | 2007           | Rejmanek et al. | II/V    | g       | na             | G  | -  | -       | T  | -     | 9     | 12      | 12    | 9     | 17    | 10    | 18    | 11       | 13    |        |       |         |        |        |       |
| SO4972    | 812            | 2007           | Rejmanek et al. | VI/VII  | y       | na             | -  | -  | -       | -  | G     | 9     | 11      | 13    | 9     | 19    | 10    | 14    | 9        | 15    |        |       |         |        |        |       |
| SO5002    | 259            | 2007           | Rejmanek et al. | VI/VII  | y       | na             | -  | -  | -       | -  | G     | 9     | 11      | 13    | 9     | 19    | 10    | 14    | 9        | 15    |        |       |         |        |        |       |
| SO5073    | 261            | 2007           | Rejmanek et al. | II/V    | g       | na             | G  | -  | -       | T  | -     | 9     | 12      | 12    | 9     | 17    | 10    | 18    | 11       | 13    |        |       |         |        |        |       |
| SO5110    | 323            | 2007           | Rejmanek et al. | II/V    | g       | na             | G  | -  | -       | T  | -     | 9     | 12      | 12    | 9     | 17    | 10    | 18    | 11       | 13    |        |       |         |        |        |       |
| SO5226    | 289            | 2008           | Rejmanek et al. | III     | k       | na             | G  | -  | -       | T  | G     | 9     | 13      | 12    | 9     | 17    | 10    | 18    | 11       | 13    |        |       |         |        |        |       |
| SO5259    | 827            | 2008           | Rejmanek et al. | I       | a       | na             | -  | -  | -       | -  | -     | 10    | 11      | 13    | 9     | 22    | 10    | 17    | 9        | 14    |        |       |         |        |        |       |
| SO5263    | 833            | 2008           | Rejmanek et al. | I       | gg      | na             | -  | -  | -       | -  | -     | 10    | 11      | 12    | 9     | 21    | 10    | 17    | 9        | 14    |        |       |         |        |        |       |
| SO5274    | 321            | 2008           | Rejmanek et al. | I       | a       | na             | -  | -  | -       | -  | -     | 10    | 11      | 13    | 9     | 22    | 10    | 17    | 9        | 14    |        |       |         |        |        |       |
| SO5278    | 321            | 2008           | Rejmanek et al. | I       | a       | na             | -  | -  | -       | -  | -     | 10    | 11      | 13    | 9     | 22    | 10    | 17    | 9        | 14    |        |       |         |        |        |       |
| SO5283    | 330            | 2008           | Rejmanek et al. | IV      | m       | na             | G  | -  | -       | T  | -     | 9     | 11      | 12    | 9     | 18    | 10    | 17    | 9        | 13    |        |       |         |        |        |       |
| SO5296    | 318            | 2008           | Rejmanek et al. | II/V    | g       | na             | G  | -  | -       | T  | -     | 9     | 12      | 12    | 9     | 17    | 10    | 18    | 11       | 13    |        |       |         |        |        |       |
| HS1423    | CA             | Jul-99         | Wendte et al.   | VI      | t       | 5              | -  | -  | -       | -  | G     | 10    | 10      | 13    | 9     | 17    | 10    | 14    | 9        | 14    | 9      | 15    | 81      |        |        |       |
| HS1531    | CA             | Jul-99         | Wendte et al.   | II      | g       | 1              | G  | -  | -       | T  | -     | 9     | 12      | 12    | 9     | 17    | 10    | 18    | 11       | 13    | 9      | 17    | 120     |        |        |       |
| HS0604    | WA             | Jun-04         | This study      | VI      | r       | 5              | -  | -  | -       | -  | G     | 10    | 11      | 13    | 9     | 18    | 10    | 14    | 10       | 13    | 14     | 16    | 81      |        |        |       |
| HS0604-03 | WA             | Jun-04         | This study      | ?       | ee      | na             | na | na | na      | na | na    | 9     | 10      | 15    | 9     | 19    | 10    | 16    | 8        | 14    | na     | 16    | 81      |        |        |       |
| HS0606-06 | WA             | Jun-06         | This study      | VI/VII  | s       | na             | -  | -  | -       | -  | G     | 10    | 11      | 13    | 9     | 19    | 10    | 16    | 10       | 14    | 14     | 16    | 81      |        |        |       |
| HSGI07-12 | WA             | 2007           | This study      | VI      | ff      | 5              | -  | -  | -       | -  | G     | 10    | 11      | 13    | 9     | 19    | 10    | 16    | 10       | 13    | 14     | 16    | 81      |        |        |       |
| Porp      | Monterey, CA   | 2006           | Rejmanek et al. | II/V    | g       | na             | G  | -  | -       | T  | -     | 9     | 12      | 12    | 9     | 17    | 10    | 18    | 11       | 13    |        |       |         |        |        |       |
| H1        | Santa Rosa, CA | 1994           | Wendte et al.   | II      | g       | 1              | G  | -  | -       | T  | -     | 9     | 12      | 12    | 9     | 17    | 10    | 18    | 11       | 13    | 9      | 17    |         |        |        |       |
| H2        | Santa Rosa, CA | 1994           | Wendte et al.   | II      | g       | 1              | G  | -  | -       | T  | -     | 9     | 12      | 12    | 9     | 17    | 10    | 18    | 11       | 13    | 9      | 17    |         |        |        |       |
| H3        | CA             | 1995           | Wendte et al.   | II      | g       | 1              | G  | -  | -       | T  | -     | 9     | 12      | 12    | 9     | 17    | 10    | 18    | 11       | 13    | 9      | 17    | 120     |        |        |       |
| H4        | MO             | 1999           | Rejmanek et al. | XII     | dd      | na             | -  | -  | -       | G  | G     | 10    | 16      | 13    | 9     | 19    | 11    | 14    | 10       | 14    |        |       |         |        |        |       |
| H5        | MO             | 1999           | Rejmanek et al. | I/IX/X? | o       | na             | -  | -  | -       | -  | -     | 9     | 11      | 12    | 9     | 18    | 10    | 17    | 10       | 16    |        |       |         |        |        |       |
| H6        | Berkeley, CA   | 2009           | Rejmanek et al. | II/V    | g       | na             | G  | -  | -       | T  | -     | 9     | 12      | 12    | 9     | 17    | 10    | 18    | 11       | 13    |        |       |         |        |        |       |
| H7        | Berkeley, CA   | 2009           | Rejmanek et al. | XI      | cc      | na             | -  | -  | -       | -  | G     | 9     | 13      | 13    | 10    | 16    | 10    | 14    | 9        | 14    |        |       |         |        |        |       |
| O1        | Monterey, CA   | 2005           | Rejmanek et al. | X       | z       | na             | -  | -  | -       | -  | -     | 9     | 10      | 13    | 10    | 20    | 10    | 14    | 9        | 14    |        |       |         |        |        |       |
| O2        | Monterey, CA   | 2006           | Rejmanek et al. | X       | z       | na             | -  | -  | -       | -  | -     | 9     | 10      | 13    | 10    | 20    | 10    | 14    | 9        | 14    |        |       |         |        |        |       |
| O3        | Monterey, CA   | 2005           | Rejmanek et al. | VIII    | x       | na             | -  | -  | -       | -  | G     | 9     | 11      | 13    | 9     | 20    | 10    | 14    | 9        | 15    |        |       |         |        |        |       |
| O4        | Rio vista, CA  | 2007           | Rejmanek et al. | II/V    | j       | na             | G  | -  | -       | T  | -     | 9     | 12      | 12    | 9     | 17    | 10    | 18    | 10       | 13    |        |       |         |        |        |       |

Table S1 Continued

*Sarcocystis neurona* genotypes and sample source information

| Sample | ATOS/Geo. Loc. | Date collected | Source          | Ag Type | MS Type | Genetic Marker |   |         |   |   |       |         |       |       |       |       |       |       | NT count |       |        |       |         |        |       |
|--------|----------------|----------------|-----------------|---------|---------|----------------|---|---------|---|---|-------|---------|-------|-------|-------|-------|-------|-------|----------|-------|--------|-------|---------|--------|-------|
|        |                |                |                 |         |         | SnSAG1-5-6     |   | SnSAG3* |   |   |       | SnSAG4† | Sn2   | Sn3   | Sn4   | Sn5   | Sn7   | Sn8   |          | Sn9   | Sn10   | Sn11  | Sn1520  | Sn1863 | Sn515 |
|        |                |                |                 |         |         | C              | A | T       | C | C | (GT)n | (AT)n   | (CA)n | (CA)n | (CA)n | (CA)n | (GT)n | (AT)n |          | (CA)n | (CTA)n | (AC)n | complex |        |       |
| O5     | Monterey, CA   | 2007           | Rejmanek et al. | II/V    | g       | na             | G | -       | - | T | -     | 9       | 12    | 12    | 9     | 17    | 10    | 18    | 11       | 13    |        |       |         |        |       |
| O6     | Monterey, CA   | 2008           | Rejmanek et al. | VI/VII  | x       | na             | - | -       | - | - | G     | 9       | 11    | 13    | 9     | 20    | 10    | 14    | 9        | 15    |        |       |         |        |       |
| O7     | Monterey, CA   | 2008           | Rejmanek et al. | II/V    | g       | na             | G | -       | - | T | -     | 9       | 12    | 12    | 9     | 17    | 10    | 18    | 11       | 13    |        |       |         |        |       |
| O8     | Monterey, CA   | 2008           | Rejmanek et al. | VIII    | x       | na             | - | -       | - | - | G     | 9       | 11    | 13    | 9     | 20    | 10    | 14    | 9        | 15    |        |       |         |        |       |
| O9     | Monterey, CA   | 2008           | Rejmanek et al. | II/V    | g       | na             | G | -       | - | T | -     | 9       | 12    | 12    | 9     | 17    | 10    | 18    | 11       | 13    |        |       |         |        |       |
| O10    | Rio vista, CA  | 2007           | Rejmanek et al. | IX      | aa      | na             | - | -       | - | - | -     | 9       | 10    | 13    | 9     | 17    | 10    | 18    | 9        | 13    |        |       |         |        |       |
| O11    | GA             | 2008           | Rejmanek et al. | VI/VII  | bb      | na             | - | -       | - | - | G     | 10      | 12    | 13    | 9     | 23    | 10    | 14    | 11       | 14    |        |       |         |        |       |
| O12    | GA             | 2008           | Rejmanek et al. | VIII    | bb      | na             | - | -       | - | - | G     | 10      | 12    | 13    | 9     | 23    | 10    | 14    | 11       | 14    |        |       |         |        |       |
| O13    | IL             | 2008           | Rejmanek et al. | VI/VII  | v       | na             | - | -       | - | - | G     | 10      | 11    | 13    | 10    | 16    | 10    | 14    | 10       | 14    |        |       |         |        |       |
| R1     | WI             | 2006           | Wendte et al.   | VI      | q       | 5              | - | -       | - | - | G     | 10      | 11    | 14    | 9     | 17    | 10    | 14    | 10       | 14    | 15     | 16    | 81      |        |       |
| R2     | WI             | 2006           | Wendte et al.   | VI      | p       | 5              | - | -       | - | - | G     | 10      | 11    | 13    | 9     | 17    | 10    | 14    | 10       | 14    | 15     | 16    | 81      |        |       |
| Cat    | MO             | 2000           | Rejmanek et al. | II/V    | g       | na             | G | -       | - | T | -     | 9       | 12    | 12    | 9     | 17    | 10    | 18    | 11       | 13    |        |       |         |        |       |

ATOS: The 'As The Otter Swims' number refers to each sea otter's stranding location, based upon defined and sequential 0.5 kilometer segments of the California coastline, starting with zero (0) just north of San Francisco and increasing numerically from north to south.

SO: Sea Otter; HS: Harbor Seal; Porp: Porpoise; H: Horse; O: Opossum; R: Raccoon

CA: California; WA: Washington; MO: Missouri; GA: Georgia; IL: Illinois; WI: Wisconsin

NT: nucleotide

na: Not Available

\*numbers refer to nucleotide position on reference sequence: GQ851954

†numbers refer to nucleotide position on reference sequence: GQ851957

‡Samples are organized and color coded by host species in the left columns (Blue: sea otter; Dark Blue: sea otters stranded in the 2004 epizootic; Sea Green: marine mammals other than sea otters; Brown: terrestrial mammals) and then color coded by antigen (Ag) and Microsatellite (MS) type in the remaining columns

#Samples from Wendte et al. were additionally typed at MS markers Sn2-Sn5, Sn7, Sn8, Sn10, Sn11, Sn1520, Sn1863, Sn515 for the current study
