# Supplementary material for: Self-Mating in the Definitive Host Potentiates Clonal Outbreaks of the Apicomplexan Parasites Sarcocystis neurona and Toxoplasma gondii
Source: PubMed Central journal article supplement (PMC3009688; doi:10.1371/journal.pgen.1001261), 2010-12-23
Supplement: pgen.1001261.s002.pdf [file pgen.1001261.s002.pdf]

Table S2 Genotype Presence Over Time in California

| Clonal Complex | Ag type | MS type | Year |    |    |    |    |    |    |    |    |    |    |    |    | Total | ST Life span (years) | CC Life span (years) |
|----------------|---------|---------|------|----|----|----|----|----|----|----|----|----|----|----|----|-------|----------------------|----------------------|
|                |         |         | 94   | 95 | 99 | 00 | 01 | 02 | 03 | 04 | 05 | 06 | 07 | 08 | 09 |       |                      |                      |
| 1              | I       | a       |      |    |    |    | 3  |    | 1  |    |    | 1  |    | 3  | 8  | 7     | 7                    |                      |
| 1              | I       | b       |      |    |    |    | 1  |    |    | 1  |    |    |    |    | 2  | 3     |                      |                      |
| 1              | I       | c       |      |    |    |    |    |    |    | 13 |    |    |    |    | 13 | 1     |                      |                      |
| 1              | I       | d       |      |    |    |    |    |    |    | 1  |    |    |    |    | 1  | 1     |                      |                      |
| 1              | I       | e       |      |    |    |    |    |    |    |    | 1  |    |    |    | 1  | 1     |                      |                      |
| 1              | I       | gg      |      |    |    |    |    |    |    |    |    |    |    | 1  | 1  | 1     |                      |                      |
| 2              | II      | g       | 2    | 1  |    |    | 2  | 1  | 1  | 1  | 2  | 6  | 5  | 3  | 1  | 24    | 15                   | 15                   |
| 2              | II      | i       |      |    | 1  |    |    |    |    |    |    |    |    |    | 1  | 1     |                      |                      |
| 2              | II      | j       |      |    |    |    |    |    |    |    |    |    | 1  |    | 1  | 1     |                      |                      |
| 2              | III     | k       |      |    |    |    |    |    |    |    |    |    |    | 1  | 1  | 1     |                      |                      |
| 3              | III     | l       |      |    |    |    |    |    |    |    | 1  |    |    |    | 1  | 1     | 8                    |                      |
| 3              | IV      | m       |      |    |    |    |    |    |    |    |    |    |    | 1  | 1  | 1     |                      |                      |
| 3              | V       | n       |      |    |    | 1  |    |    |    |    |    |    |    |    | 1  | 1     |                      |                      |
| 6              | VI      | t       |      |    | 1  |    |    |    |    |    |    |    |    |    | 1  | 1     | 7                    |                      |
| 6              | VI      | u       |      |    |    |    |    |    |    |    |    | 1  |    |    | 1  | 1     |                      |                      |
| 7              | VII     | x       |      |    |    |    |    | 1  |    |    |    |    |    | 1  | 2  | 7     | 7                    |                      |
| 7              | VII     | y       |      |    |    |    |    | 1  |    |    |    |    | 2  |    | 3  | 6     |                      |                      |
| 7              | VIII    | x       |      |    |    |    |    |    |    |    | 1  |    |    | 1  | 2  | 3     |                      |                      |
| 8              | IX      | w       |      |    |    |    |    | 1  |    |    | 1  |    |    |    | 2  | 3     | 5                    |                      |
| 8              | X       | z       |      |    |    |    |    |    |    |    | 1  | 1  | 1  |    | 3  | 3     |                      |                      |
| Singleton      | I       | f       |      |    |    |    |    |    |    |    | 1  |    |    |    | 1  | 1     |                      |                      |
| Singleton      | IX      | aa      |      |    |    |    |    |    |    |    |    |    |    | 1  | 1  | 1     |                      |                      |
| Singleton      | XI      | cc      |      |    |    |    |    |    |    |    |    |    |    |    | 1  | 1     |                      |                      |
| Total          |         |         | 2    | 1  | 2  | 1  | 9  | 1  | 2  | 19 | 6  | 9  | 9  | 11 | 2  |       |                      |                      |

Ag: Antigen gene

MS: Microsatellite

ST: Sequence Type (combination of Ag and MS type)

CC: Clonal Complex
